# Supplementary material
Source: PubMed Central journal article supplement (PMC9926876)
Supplement: NIHMS1864908-supplement-Supplemental_Table_Captions.pdf [file NIHMS1864908-supplement-Supplemental_Table_Captions.pdf]

**Table S1. Expression of Annotated Transcripts in the 8q24 MYC-rs55705857 Region, stratified by Human Glioma Subtype and by rs55705857 Genotype.**

**Table S2. GSEA Hallmark50 Gene Sets in IDHmut vs Gliosis and IDHmut\_noncode1 by SNP genotype**

**Table S3. MYC target gene signatures**

**Table S4. Supplementary Methods**
